# Supplementary material
Source: PubMed Central journal article supplement (PMC2878561)
Supplement: supp_M110.102988_jbc.M110.102988-1.pdf [file supp_M110.102988_jbc.M110.102988-1.pdf]

**Supplementary table 1.** PCR primer sequences used in this study

| <b><i>Experiment</i></b>                                                                 | <b><i>Primer sequence (5'-3')</i></b>            |
|------------------------------------------------------------------------------------------|--------------------------------------------------|
| Rapid amplification of cDNA ends of mouse MA-nSMase                                      | #1:CAAATGTGTACAATGAAGGTATCCCACG                  |
|                                                                                          | #2: CATTCCAGCAGCAGCGTTAGCTGTTTGC                 |
| Amplifying 1.5-kb cDNA containing the full-length coding region of MA-nSMase             | Forward: GAAACCAATGAGTCTCCCTGACATTTTCG           |
|                                                                                          | Reverse: TCCCCTTGTCTGGGCACCAGCGTCAG              |
| Amplifying the full-length coding sequence of MA-nSMase to make MA-nSMase-pcDNA3 vector. | Forward:<br>CGCTCGAGAAACCAATGAGTCTCCCTGACATTTTCG |
|                                                                                          | Reverse: GAGCATAACCACTTGAAGCTTCAGGC              |
| Real time RT-PCR for mouse MA-nSMase                                                     | Forward: CCGTTGAGGATGGACATATTCG                  |
|                                                                                          | Reverse: GGAGGACGCTGAAGGCTAC                     |
| Real time RT-PCR for $\beta$ -actin                                                      | Forward: ATTGGCAACGAGCGGTTCC                     |
|                                                                                          | Reverse: TGTAGTTTCATGGATGCCACA                   |
